# Supplementary material for: Reversible chain association/dissociation via a CO2 responsive crosslinking/decrosslinking system
Source: Royal Society of Chemistry journal article supplement (doi:10.1039/c1cc12084k), 2011-01-01
Supplement: c1cc12084k.pdf [file c1cc12084k.pdf]

Manuscript for Supporting Information

## **Reversible Chain Association/Dissociation in an Aqueous Medium via a CO<sub>2</sub> Responsive Crosslinking/Decrosslinking System**

*Daisuke Nagai,<sup>\*</sup> Akinori Suzuki, Yasuyuki Maki, and Hiroyuki Takeno*

Department of Chemistry and Chemical Biology, Graduate School of Engineering, Gunma University,  
1-5-1 Tenjin-cho, Kiryu, Gunma 376-8515, Japan.

E-mail: [nagai@chem-bio.gunma-u.ac.jp](mailto:nagai@chem-bio.gunma-u.ac.jp)

Correspondence to: D. Nagai (Tel: +81-277-30-1485, Fax: +81-277-30-1409)

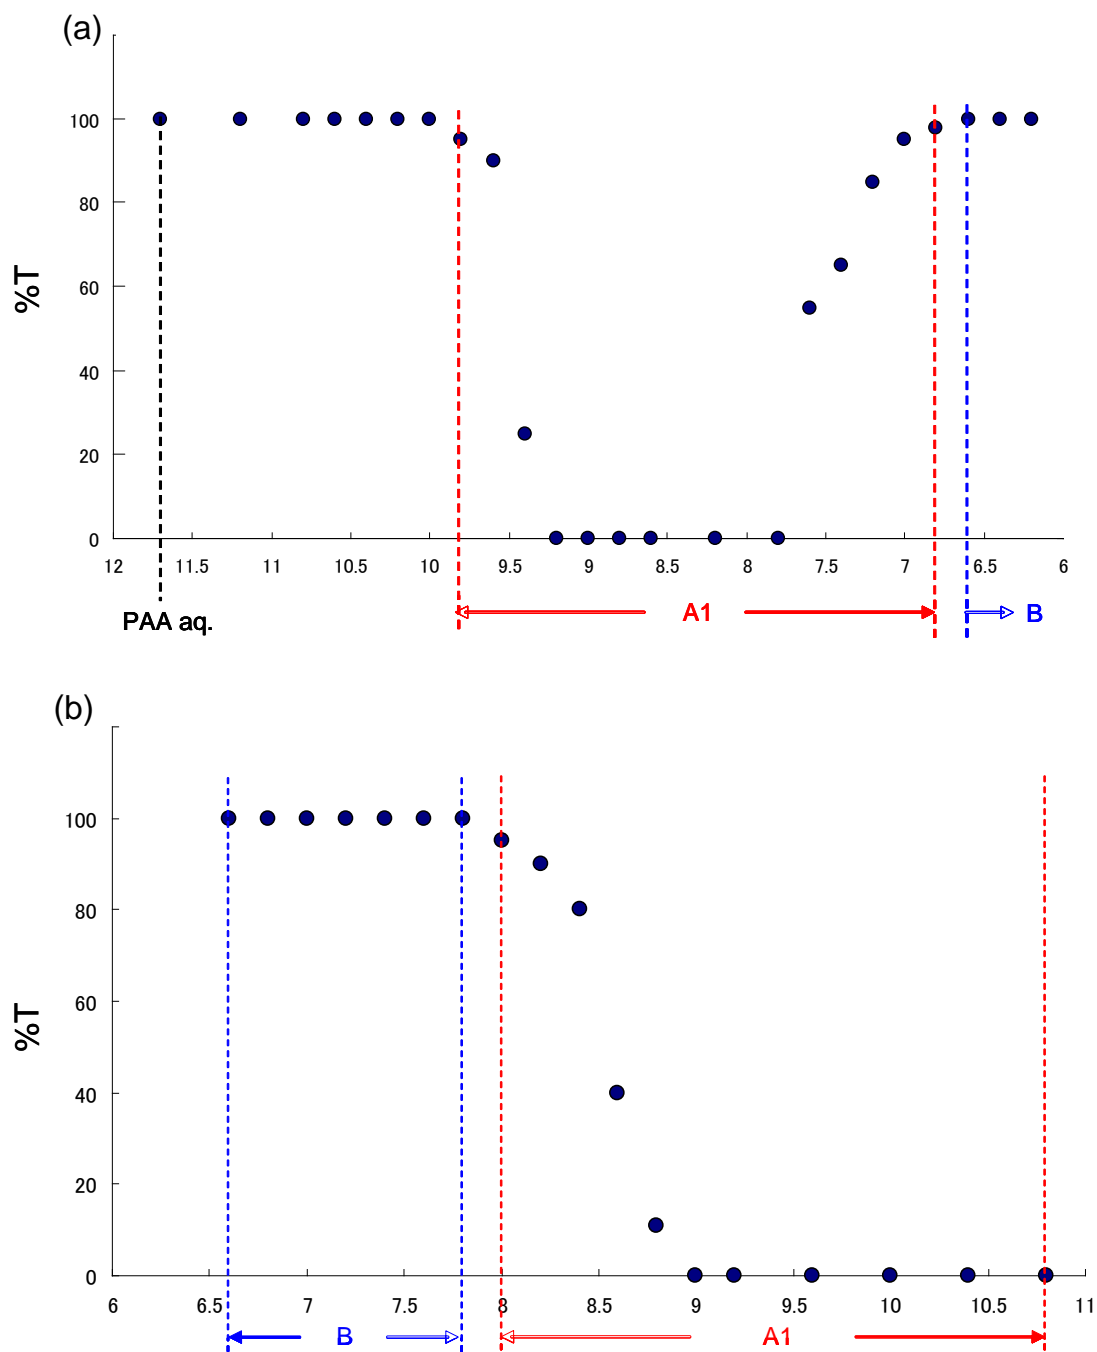

**Fig. S1.** Change of percent transmittance in PAA aqueous solution as a function of pH at ambient temperature. (a) Change of %T in PAA aqueous solution with addition of CO<sub>2</sub>; (b) Change of %T in B with addition of 0.2 M NaOH aq.

**Materials.** Polyallylamine (PAA, 10.4 wt % aqueous solution,  $M_w = 25000$ ) was supplied by Nittobo (sample code PAA-25). Styrene (Tokyo Kasei Kogyo, >99.0 %) and divinylbenzene (Aldrich, >80.0 %) were purified by distillation. 2,2'-Azobis(4-methoxy-2,4-dimethylvaleronitrile) (Wako Pure Chemical, >95.0 %) were commercially available and used as received.

**Instruments.**  $^{13}\text{C}$  NMR spectra were recorded with a JEOL JNM- $\lambda$ 500 using  $\text{D}_2\text{O}$  as a solvent; the  $\delta$  values are given in parts per million (ppm). Optical microscope was performed using an OLYMPUS BXP instrument. Scanning electron microscopy (SEM) was performed using a Hitachi S3000N instrument at an acceleration voltage of 1.5 kV.

**Dynamic light scattering (DLS) measurements.** In order to study the association and dissociation of PAA chains under various  $\text{CO}_2$  concentration, dynamic light scattering (DLS) measurements were performed with the Zetasizer Nano ZS system (Malvern). In the system, a He-Ne laser is used as a light source and the scattering angle is  $173^\circ$ . The distribution of hydrodynamic diameter was calculated by Laplace inversion of intensity-intensity autocorrelation function  $g^{(2)}(\tau)$  with the COTIN program.

**Phase behavior of PAA aqueous solution in the presence of  $\text{CO}_2$ .** An aqueous solution of PAA (1.0 wt%, 2.0 mL) was placed in a vial with a rubber septum. A balloon with a needle attached was filled with  $\text{CO}_2$  (1 atm), and the needle was inserted into the rubber septum of the vial to allow the  $\text{CO}_2$  to enter. The mixture was stirred, and the phase behavior of ~A1, A1, ~B, and B was observed; then, the rubber septum was opened, the mixture was stirred, and the phase behavior of A2 was observed.

$^{13}\text{C}$  NMR (500 MHz,  $\text{D}_2\text{O}$ , rt,  $\delta$  in ppm): PAA: 35.20–35.75 (br,  $-\text{CH}_2\text{CH}(\text{CH}_2\text{NH}_2)-$ ), 44.73 (s,  $-\text{CH}_2\text{NH}_2-$ ).

~A1 (prepared by centrifugation, followed by lyophilization): 32.59–40.00 (br m,  $-\text{CH}_2\text{CH}(\text{CH}_2\text{NH}_2)-$ ,  $-\text{CH}_2\text{CH}(\text{CH}_2\text{NHCOO}^-)-$ ,  $-\text{CH}_2\text{CH}(\text{CH}_2\text{NH}_3^+)-$ ), 44.73 (br,  $-\text{CH}_2\text{NH}_2-$ ,  $-\text{CH}_2\text{NHCOO}^-$ ,  $-\text{CH}_2\text{NH}_3^+$ ), 165.26 (s,  $-\text{NHCOO}^-\cdot\text{H}_3\text{N}^+-$ )

A1 (prepared by centrifugation, followed by lyophilization): 31.21–38.51 (br m,  $-\text{CH}_2\text{CH}(\text{CH}_2\text{NH}_2)-$ ,  $-\text{CH}_2\text{CH}(\text{CH}_2\text{NHCOO}^-)-$ ,  $-\text{CH}_2\text{CH}(\text{CH}_2\text{NH}_3^+)-$ , 42.88–47.20 (br m,  $-\text{CH}_2\text{NH}_2$ ,  $-\text{CH}_2\text{NHCOO}^-$ ,  $\text{CH}_2\text{NH}_3^+$ ), 165.22 (s,  $-\text{NHCOO}^- \cdot \text{H}_3\text{N}^+-$ ).

~B (prepared by lyophilization): 29.10–37.51 (br m,  $-\text{CH}_2\text{CH}(\text{CH}_2\text{NH}_2)-$ ,  $-\text{CH}_2\text{CH}(\text{CH}_2\text{NHCOO}^-)-$ ,  $\text{CH}_2\text{CH}(\text{CH}_2\text{NH}_3^+)-$ ,  $-\text{CH}_2\text{CH}(\text{CH}_2\text{NH}_3^+ \cdot \text{HCO}_3^-)-$ , 41.67–46.89 (br m,  $-\text{CH}_2\text{NH}_2$ ,  $-\text{CH}_2\text{NHCOO}^-$ ,  $\text{CH}_2\text{NH}_3^+$ ,  $-\text{CH}_2\text{NH}_3^+ \cdot \text{HCO}_3^-$ ), 161.20 (s,  $-\text{CH}_2\text{NH}_3^+ \cdot \text{HCO}_3^-$ ), 165.15 (s,  $-\text{NHCOO}^- \cdot \text{H}_3\text{N}^+-$ ).

B (prepared by lyophilization): 30.88–39.00 (br m,  $-\text{CH}_2\text{CH}(\text{CH}_2\text{NH}_2)-$ ,  $-\text{CH}_2\text{CH}(\text{CH}_2\text{NHCOO}^-)-$ ,  $\text{CH}_2\text{CH}(\text{CH}_2\text{NH}_3^+)-$ ,  $-\text{CH}_2\text{CH}(\text{CH}_2\text{NH}_3^+ \cdot \text{HCO}_3^-)-$ , 42.00–48.02 (br m,  $-\text{CH}_2\text{NH}_2$ ,  $-\text{CH}_2\text{NHCOO}^-$ ,  $\text{CH}_2\text{NH}_3^+$ ,  $-\text{CH}_2\text{NH}_3^+ \cdot \text{HCO}_3^-$ ), 161.00 ((s,  $-\text{CH}_2\text{NH}_3^+ \cdot \text{HCO}_3^-$ ), 165.00 (s,  $-\text{NHCOO}^- \cdot \text{H}_3\text{N}^+-$ ).

~A2 (prepared by centrifugation, followed by lyophilization): 29.10–37.51 (br m,  $-\text{CH}_2\text{CH}(\text{CH}_2\text{NH}_2)-$ ,  $-\text{CH}_2\text{CH}(\text{CH}_2\text{NHCOO}^-)-$ ,  $-\text{CH}_2\text{CH}(\text{CH}_2\text{NH}_3^+)-$ ,  $-\text{CH}_2\text{CH}(\text{CH}_2\text{NH}_3^+ \cdot \text{HCO}_3^-)-$ , 41.67–46.89 (br m,  $-\text{CH}_2\text{NH}_2$ ,  $-\text{CH}_2\text{NHCOO}^-$ ,  $-\text{CH}_2\text{NH}_3^+$ ,  $-\text{CH}_2\text{NH}_3^+ \cdot \text{HCO}_3^-$ ), 161.20 (s,  $-\text{CH}_2\text{NH}_3^+ \cdot \text{HCO}_3^-$ ), 165.15 (s,  $-\text{NHCOO}^-$ ).

A2 (prepared by centrifugation, followed by lyophilization): 31.00–37.50 (br m,  $-\text{CH}_2\text{CH}(\text{CH}_2\text{NH}_2)-$ ,  $\text{CH}_2\text{CH}(\text{CH}_2\text{NHCOO}^-)-$ ,  $-\text{CH}_2\text{CH}(\text{CH}_2\text{NH}_3^+)-$ ,  $-\text{CH}_2\text{CH}(\text{CH}_2\text{NH}_3^+ \cdot \text{HCO}_3^-)-$ , 42.00–47.00 (br m,  $-\text{CH}_2\text{NH}_2$ ,  $-\text{CH}_2\text{NHCOO}^-$ ,  $-\text{CH}_2\text{NH}_3^+$ ,  $-\text{CH}_2\text{NH}_3^+ \cdot \text{HCO}_3^-$ ), 161.80 ((s,  $-\text{CH}_2\text{NH}_3^+ \cdot \text{HCO}_3^-$ ), 165.20 (s,  $-\text{NHCOO}^- \cdot \text{H}_3\text{N}^+-$ ).

**Synthesis of porous crosslinked polystyrene.** Styrene (0.12 mL, 1.05 mmol), divinylbenzene (10.0 mg, 0.06 mmol), and A1 particles (100 mg), which was prepared by centrifugation, followed by freeze dry, were fed into a test tube, and mixed by vigorous stirring. The test tube was cooled, degassed, and the atmosphere was replaced with nitrogen. To the mixture, 2,2'-azobis(4-methoxy-2,4-dimethylvaleronitrile) (3.00 mg, 0.01 mmol) was added, and the mixture was stirred at 25°C for 20 h.

The mixture was added into distilled water (100 mL), and the resulting precipitate was collected by filtration with suction. The solid was washed with distilled water (50.0 mL) in the presence of CO<sub>2</sub> for 24 h, and collected by filtration with suction and dried by lyophilization to obtain the products as a white powder (80.0 g).
